# Supplementary material for: Learning Cell Biology as a Team: A Project-Based Approach to Upper-Division Cell Biology
Source: Atypon-hosted journal article supplement (doi:10.1187/cbe.02-03-0006), 2002-12-01
Supplement: cellbioed_1_4_145_appendix_c.pdf [file cellbioed_1_4_145_appendix_c.pdf]

## Appendix C

### Evaluation Criteria and Checklist for Presentation and Paper on Cellular and Molecular Biology of Human Disease

| Part of presentation                                        | Criteria                                                                                                 | Excellent | Very good | Good | Average | Poor |
|-------------------------------------------------------------|----------------------------------------------------------------------------------------------------------|-----------|-----------|------|---------|------|
| <b>In-class Presentation: Cell Biology of Human Disease</b> |                                                                                                          |           |           |      |         |      |
| <b>Introduction</b>                                         | <b>Set stage for talk; give necessary background; give take-home message.</b>                            |           |           |      |         |      |
|                                                             | Was it clear how the talk would progress (can be outline or just stated)?                                |           |           |      |         |      |
| <b>Symptoms of Disease</b>                                  | <b>Tell the class how doctors determine whether or not a patient is suffering from this disease.</b>     |           |           |      |         |      |
|                                                             | What are the symptoms of patients with this disease?                                                     |           |           |      |         |      |
|                                                             | Do the symptoms vary? In what way?                                                                       |           |           |      |         |      |
|                                                             | Were all terms clearly defined?                                                                          |           |           |      |         |      |
|                                                             | Is it clear that the presenters understand the symptoms?                                                 |           |           |      |         |      |
| <b>General Cell Biology of Disease</b>                      | <b>What organelle(s) and processes are affected and why does that defect lead to the disease?</b>        |           |           |      |         |      |
|                                                             | What cellular structure or organelle (process) is defective in patients with this disease?               |           |           |      |         |      |
|                                                             | Briefly review the function of the organelle.                                                            |           |           |      |         |      |
|                                                             | Why do defects in that organelle lead to the disease?                                                    |           |           |      |         |      |
|                                                             | What kinds of variations in symptoms exist? What is the basis for that variation?                        |           |           |      |         |      |
| <b>Specific Gene Information</b>                            | <b>How is the particular gene you are analyzing related to this disease?</b>                             |           |           |      |         |      |
|                                                             | How was this gene identified?                                                                            |           |           |      |         |      |
|                                                             | What does the gene product do?                                                                           |           |           |      |         |      |
|                                                             | What mutations in this gene are associated with the disease? How is the disease inherited?               |           |           |      |         |      |
|                                                             | Is the gene present in nonhumans? If so, does it perform the same function as in humans?                 |           |           |      |         |      |
|                                                             | Are there any model organisms for the disease? What do they reveal about the disease?                    |           |           |      |         |      |
| <b>Above and Beyond: Exceptional presentations</b>          |                                                                                                          |           |           |      |         |      |
|                                                             | Was any novel approach or interesting anecdote given that would help the audience remember this subject? |           |           |      |         |      |

| Part of presentation                                   | Criteria                                                                                                                                  | Excellent | Very good | Good | Average | Poor |
|--------------------------------------------------------|-------------------------------------------------------------------------------------------------------------------------------------------|-----------|-----------|------|---------|------|
| <b>Overheads/Demos, etc.</b>                           |                                                                                                                                           |           |           |      |         |      |
|                                                        | Were overheads legible and easy to follow?                                                                                                |           |           |      |         |      |
|                                                        | Was the main topic clearly stated on the overhead?                                                                                        |           |           |      |         |      |
|                                                        | Were lists of definitions provided?                                                                                                       |           |           |      |         |      |
| Part of report                                         | Criteria                                                                                                                                  | Excellent | Very good | Good | Average | Poor |
| <b>Reports/Handouts: Cell Biology of Human Disease</b> |                                                                                                                                           |           |           |      |         |      |
| <b>General</b>                                         |                                                                                                                                           |           |           |      |         |      |
|                                                        | Were the roles of each group member described?                                                                                            |           |           |      |         |      |
|                                                        | Was the report divided into appropriate sections?                                                                                         |           |           |      |         |      |
|                                                        | Was the report well written?                                                                                                              |           |           |      |         |      |
|                                                        | Was the writing clear and to the point?                                                                                                   |           |           |      |         |      |
|                                                        | Was jargon avoided? Were all terms defined?                                                                                               |           |           |      |         |      |
|                                                        | Were topic sentences clearly present in each paragraph?                                                                                   |           |           |      |         |      |
|                                                        | Did each sentence relate to the prior sentence and look forward to the next (i.e., was the flow of the writing appropriate?)?             |           |           |      |         |      |
|                                                        | Did the report include all references?                                                                                                    |           |           |      |         |      |
|                                                        | Was the report forward looking (i.e., were problems that remain, challenges for future researchers, etc., pointed out?)?                  |           |           |      |         |      |
|                                                        | Was the discussion log properly maintained? (Reports without a log will not be graded.)                                                   |           |           |      |         |      |
|                                                        | Did each member of the group turn in evaluations of group participation? (Grades will not be given until these evaluations are received.) |           |           |      |         |      |
| <b>Above &amp; Beyond</b>                              | <b>Did anything make this report stand out from others?</b>                                                                               |           |           |      |         |      |
|                                                        | Describe below and rate to right:                                                                                                         |           |           |      |         |      |

**Cellular and Molecular Biology of Disease Presentation Checklist**  
Presentation and Papers on Wednesday, July 18–Thursday, July 19

|              | Question                                                 | Answer                                                                                                                                                                                                                                                                                                                                                                                                                                                                             | Check                                                                                                                                                                                                                           |
|--------------|----------------------------------------------------------|------------------------------------------------------------------------------------------------------------------------------------------------------------------------------------------------------------------------------------------------------------------------------------------------------------------------------------------------------------------------------------------------------------------------------------------------------------------------------------|---------------------------------------------------------------------------------------------------------------------------------------------------------------------------------------------------------------------------------|
| Paper        | When is it due?                                          | The completed paper is due at the beginning of class on Wednesday. I need BOTH a hard copy and a floppy (or CD or Zip).                                                                                                                                                                                                                                                                                                                                                            |                                                                                                                                                                                                                                 |
|              | How long can it be?                                      | Paper should be ABOUT 5 pages long, single spaced, 12-point font, 1-inch margins. It CAN be longer if necessary—I will read everything you turn in and count it for your grade. The references and any figures do not count in the page total.                                                                                                                                                                                                                                     |                                                                                                                                                                                                                                 |
|              | What is the format?                                      | The paper should be divided into clearly marked sections, corresponding to the evaluation checklist and to the parts of your talk. You can modify the checklist to reflect your particular organization or topics.                                                                                                                                                                                                                                                                 |                                                                                                                                                                                                                                 |
|              | How do I indicate who wrote which parts?                 | The paper must include information about who wrote which sections. You can put the name of the author in parentheses after the heading.                                                                                                                                                                                                                                                                                                                                            |                                                                                                                                                                                                                                 |
|              | What about references?                                   | ALL references must be included, including web-based references. You should have MORE than JUST text or web references. I estimate that you should have about 10 references. Web references in your paper should have the title of the site, the URL, and the date you referenced it.<br><i>Example:</i><br>Mitochondria: architecture dictates function,<br><a href="http://cellbio.utmb.edu/cellbio/mitoch1.htm">http://cellbio.utmb.edu/cellbio/mitoch1.htm</a> , June 27, 2001 |                                                                                                                                                                                                                                 |
|              | How do we document that the paper represents joint work? | The paper must be signed by all members of the group, stating, "We have read the entire paper and had an opportunity to make editing suggestions for all parts."                                                                                                                                                                                                                                                                                                                   |                                                                                                                                                                                                                                 |
|              | Evals                                                    | When are my team member evaluations due?                                                                                                                                                                                                                                                                                                                                                                                                                                           | You <i>MUST TURN IN</i> your team member evaluations together with your paper at the beginning of class on July 18. If these evals are not included, your team paper will lose 5 points for each day any evaluation is missing. |
| Log          | What do we do with our project log?                      | You <i>MUST TURN IN</i> your project log along with your paper. The log should be a detailed journal of all the team activities—I should be able to tell exactly what went on, who was late, who left early, etc.                                                                                                                                                                                                                                                                  |                                                                                                                                                                                                                                 |
| Presentation | How long do we have for our presentation?                | 20 minutes. You will have a warning at 18 minutes, then have 2 minutes to finish up. After 20 minutes, you will have to stop talking. After the talk, you will have 5 minutes for questions.                                                                                                                                                                                                                                                                                       |                                                                                                                                                                                                                                 |
|              | How can I have my handouts copied?                       | You can make 35 copies of your handouts to bring with you on Wednesday. Alternately, we will make copies for you IF YOU BRING THE ORIGINALS BY 5:00 on TUESDAY, July 17, 2001, to Wendy Rockhill in 248, Kincaid Hall (616-3383).                                                                                                                                                                                                                                                  |                                                                                                                                                                                                                                 |

|              | Question                                          | Answer                                                                                                                                                                                                                                                                                                                                                                                                                                                                                                                                                                                                                                                                                                                                                                                                                                                                   | Check |
|--------------|---------------------------------------------------|--------------------------------------------------------------------------------------------------------------------------------------------------------------------------------------------------------------------------------------------------------------------------------------------------------------------------------------------------------------------------------------------------------------------------------------------------------------------------------------------------------------------------------------------------------------------------------------------------------------------------------------------------------------------------------------------------------------------------------------------------------------------------------------------------------------------------------------------------------------------------|-------|
| Presentation | What are we doing about PowerPoint presentations? | <p>You are safest to stick with fonts such as Times, Arial (Geneva), or Symbol. If you use an unusual font, please embed the font in your presentation. You can do this by using the "Save as" function and checking "Embed font." Getting to the "Embed font" command varies depending on the version of PowerPoint you are using.</p> <p>If you are using PowerPoint, you must bring your presentation by 5:00, TUESDAY, July 17, to Robin Wright in 238 Kincaid Hall (685-3651). You can bring it on a floppy, CD, or Zip disk. NOTE: For Mac users, please use a PC-formatted floppy or Zip. You can also ftp it, if you know the ftp address you need to access, but again, you have to come to my office so we can get it onto my computer ahead of time and make sure it is functioning.</p> <p>To judge length of talk, estimate about one slide per minute.</p> |       |
|              | How can I practice my talk?                       | Tentative: Kincaid Hall room 114 has been reserved for all day on Tuesday, July 17 (about 8:00 until 5:00). To use the room, come see Robin in 238 Kincaid. She will have a data projector and computer that you can use for practice.                                                                                                                                                                                                                                                                                                                                                                                                                                                                                                                                                                                                                                   |       |
| Recap        | Tuesday, July 17                                  | <p>Get your PowerPoint presentation to Robin so she can load on her computer.</p> <p>Bring your handouts to Wendy so she can make copies for you.</p> <p>Double-check with Wendy or Robin to make sure that you have everything you need for your presentation.</p>                                                                                                                                                                                                                                                                                                                                                                                                                                                                                                                                                                                                      |       |
|              | Wednesday, July 18                                | <ol style="list-style-type: none"> <li>1. Turn in the paper, signed by all group members.</li> <li>2. Turn in the paper on a floppy or CD or Zip.</li> <li>3. Turn in the individual team member evaluations.</li> <li>4. Turn in the project log.</li> <li>5. Give your presentation (20 minutes + 5 minutes for questions).</li> </ol>                                                                                                                                                                                                                                                                                                                                                                                                                                                                                                                                 |       |
|              | Thursday, July 19                                 | <p>Finish presentations.</p> <p>Pick up your research paper and begin plans for next presentation.</p>                                                                                                                                                                                                                                                                                                                                                                                                                                                                                                                                                                                                                                                                                                                                                                   |       |
