# Supplementary material for: Learning Cell Biology as a Team: A Project-Based Approach to Upper-Division Cell Biology
Source: Atypon-hosted journal article supplement (doi:10.1187/cbe.02-03-0006), 2002-12-01
Supplement: cellbioed_1_4_145_appendix_e.pdf [file cellbioed_1_4_145_appendix_e.pdf]

## Appendix E

### Diseases and References Used in Project-Based Cell Biology Class (2000–2001)<sup>a,b</sup>

| Disease                                     | Organelle               | Protein, gene                  | Human interest story;<br>symptoms                                                                                                                                                                                                                                                                                                                             | Review of<br>organelle<br>or process                                                                                                                                                                                                       | Review of<br>disease                                                                                     | Research<br>papers                                                                                         |
|---------------------------------------------|-------------------------|--------------------------------|---------------------------------------------------------------------------------------------------------------------------------------------------------------------------------------------------------------------------------------------------------------------------------------------------------------------------------------------------------------|--------------------------------------------------------------------------------------------------------------------------------------------------------------------------------------------------------------------------------------------|----------------------------------------------------------------------------------------------------------|------------------------------------------------------------------------------------------------------------|
| Adrenoleuko<br>dystrophy                    | Peroxisome              | ALDP,<br>ABCD1 gene            | <a href="http://www.mtsu.edu/jsanborn/dslwl.htm">http://www.mtsu.edu/<br/>jsanborn/dslwl.htm</a><br>OMIM: <a href="http://www.ncbi.nlm.nih.gov/entrez/dispomim.cgi?id=300100">http://www.ncbi.<br/>nlm.nih.gov/entrez/<br/>dispomim.cgi?id=300100</a>                                                                                                         | (Purdue and<br>Lazarow, 2001)<br>(Gottesman and<br>Ambudkar,<br>2001)                                                                                                                                                                      | (Moser, 2000)<br>(Gould and<br>Valle, 2000)                                                              | (Liu <i>et al.</i> , 1999)<br>(Chang <i>et al.</i> ,<br>1999)<br>(Zolman <i>et al.</i> ,<br>2001)          |
| Alpha-1<br>antitrypsin<br>deficiency        | ER, secretion           | Alpha-1<br>antitrypsin,<br>AAT | <a href="http://www.alphaone.org/alpha1/special_stories/shirley_dennis.htm">http://www.alphaone.org/<br/>alpha1/special_stories/<br/>shirley_dennis.htm</a><br>OMIM: <a href="http://www.ncbi.nlm.nih.gov/entrez/dispomim.cgi?id=107400">http://www.ncbi.nlm.<br/>nih.gov/entrez/dispomim.<br/>cgi?id=107400</a>                                              | (Janciauskiene,<br>2001)<br>(Bross <i>et al.</i> ,<br>1999)<br>(Harter and<br>Reinhard,<br>2000)                                                                                                                                           | (Eriksson,<br>1999)<br>(Coakley<br><i>et al.</i> ,<br>2001)<br>(Stockley,<br>2001)                       | (Burrows <i>et al.</i> ,<br>2000)                                                                          |
| Alport's<br>disease                         | Extracellular<br>matrix | Collagen IV,<br>COL4A5         | <a href="http://www.usatoday.com/life/health/doctor/lhdoc079.htm">http://www.usatoday.com/<br/>life/health/doctor/lhdoc079.<br/>htm</a><br>OMIM: <a href="http://www.ncbi.nlm.nih.gov/entrez/dispomim.cgi?id=301050">http://www.ncbi.nlm.<br/>nih.gov/entrez/dispomim.<br/>cgi?id=301050</a>                                                                  |                                                                                                                                                                                                                                            | (Myllyharju and<br>Kivirikko,<br>2001)<br>(McCarthy and<br>Maino, 2000)                                  | (Harvey <i>et al.</i> ,<br>2001)<br>(Heikkila <i>et al.</i> ,<br>2001)<br>(Heidet <i>et al.</i> ,<br>2000) |
| Angelman<br>syndrome                        | Ubiquitination          | ANCR,<br>UBE3A                 | <a href="http://www.self-determination.org/newsletter1249/newsletter_show.htm-doc_id=10124.htm">http://www.self-<br/>determination.org/news<br/>letter1249/newsletter_show.<br/>htm-doc_id=10124.htm</a><br>OMIM: <a href="http://www.ncbi.nlm.nih.gov/entrez/dispomim.cgi?id=105830">http://www.ncbi.<br/>nlm.nih.gov/entrez/<br/>dispomim.cgi?id=105830</a> | (Wilkinson,<br>2000)<br>(Depraetere,<br>2001)                                                                                                                                                                                              | (Williams <i>et al.</i> ,<br>2001)<br>(Cassidy <i>et al.</i> ,<br>2000)                                  | (Nawaz <i>et al.</i> ,<br>1999)                                                                            |
| Duchenne<br>muscular<br>dystrophy           | Plasma<br>membrane      | Dystrophin,<br>DMD             | <a href="http://www.mdaua.org/publications/Quest/q53mccoys.html">http://www.mdaua.org/<br/>publications/Quest/<br/>q53mccoys.html</a><br>OMIM: <a href="http://www.ncbi.nlm.nih.gov/entrez/dispomim.cgi?id=310200">http://www.ncbi.nlm.<br/>nih.gov/entrez/dispomim.<br/>cgi?id=310200</a>                                                                    | (Jones <i>et al.</i> , 2000;<br>McGowan and<br>Marinkovich,<br>2000; Patton,<br>2000)<br><a href="http://www.neuro.wustl.edu/neuro/muscular/musdist/dag2.htm">http://www.neuro.<br/>wustl.edu/neuro<br/>muscular/mus<br/>dist/dag2.htm</a> | (Dubowitz,<br>2000)<br>(Chamberlain<br>and Benian,<br>2000)<br>(Winder, 2001)                            | (Bartlett <i>et al.</i> ,<br>2000)                                                                         |
| Emery–<br>Dreifuss<br>muscular<br>dystrophy | Nuclear<br>matrix       | Emerin,<br>EMD                 | <a href="http://www.jhu.edu/jhumag/1100web/witch.html">http://www.jhu.edu/<br/>jhumag/1100web/witch.<br/>html</a><br>OMIM: <a href="http://www.ncbi.nlm.nih.gov/entrez/dispomim.cgi?id=181350">http://www.ncbi.nlm.<br/>nih.gov/entrez/dispomim.<br/>cgi?id=181350</a>                                                                                        | (Gruenbaum<br><i>et al.</i> , 2000)                                                                                                                                                                                                        | (Hutchison<br><i>et al.</i> , 2001)<br>(Nagano and<br>Arahata, 2000)<br>(Morris, 2000)<br>(Wilson, 2000) | (Wilson, 2000)                                                                                             |
| Epidermolysis<br>bullosa                    | Extracellular<br>matrix | Keratin,<br>KRT5,<br>KRT14     | <a href="http://www.debra.org/Patient%20Support/article1.htm">http://www.debra.org/<br/>Patient%20Support/article1.<br/>htm</a><br>OMIM: <a href="http://www.ncbi.nlm.nih.gov/entrez/dispomim.cgi?id=131900">http://www.ncbi.nlm.<br/>nih.gov/entrez/dispomim.<br/>cgi?id=131900</a>                                                                          | (Parry and<br>Steinert, 1999)<br>(Herrmann and<br>Aebi, 2000)                                                                                                                                                                              | (Fuchs, 1998)<br>(Fuchs and<br>Cleveland,<br>1998)                                                       | (Peters <i>et al.</i> ,<br>2001)                                                                           |

| Disease                                                      | Organelle                  | Protein, gene                               | Human interest story;<br>symptoms                                                                                                                                                                                                                                                                                                                                                                   | Review of<br>organelle<br>or process                                                                                        | Review of<br>disease                                                                                                                                                            | Research<br>papers                                                                                 |
|--------------------------------------------------------------|----------------------------|---------------------------------------------|-----------------------------------------------------------------------------------------------------------------------------------------------------------------------------------------------------------------------------------------------------------------------------------------------------------------------------------------------------------------------------------------------------|-----------------------------------------------------------------------------------------------------------------------------|---------------------------------------------------------------------------------------------------------------------------------------------------------------------------------|----------------------------------------------------------------------------------------------------|
| Fibrodysplasia<br>ossificans<br>progressiva                  | Signaling                  | Not<br>determined,<br>possibly NOG,<br>BMP4 | <a href="http://www.eagletribune.com/news/stories/19990801/NH_003.htm">http://www.eagletribune.com/news/stories/19990801/NH_003.htm</a><br>or <a href="http://wire.ap.org/AP/packages/fop/index.html">http://wire.ap.org/AP/packages/fop/index.html</a><br>OMIM: <a href="http://www.ncbi.nlm.nih.gov/entrez/dispmim.cgi?id=135100">http://www.ncbi.nlm.nih.gov/entrez/dispmim.cgi?id=135100</a>    | (Miyazono <i>et al.</i> , 2001)                                                                                             | (Reddi, 1997)<br>(Nakayama <i>et al.</i> , 2000)<br>(Christian, 2000)                                                                                                           | (Helvering <i>et al.</i> , 2000)                                                                   |
| Machado–<br>Joseph<br>disease                                | Ubiquitin-<br>like protein | Ataxin 3,<br>ATX3                           | <a href="http://irmas.freeyellow.com/index.html">http://irmas.freeyellow.com/index.html</a><br><a href="http://ijdfnonprofit.freeyellow.com/newfile.html">http://ijdfnonprofit.freeyellow.com/newfile.html</a><br>OMIM: <a href="http://www.ncbi.nlm.nih.gov/entrez/dispmim.cgi?id=109150">http://www.ncbi.nlm.nih.gov/entrez/dispmim.cgi?id=109150</a>                                             | (Johnson, 2000)<br>(Weissman, 2001)<br>(Mayer, 2000)                                                                        | (Yamada <i>et al.</i> , 2000).<br>(Evidente <i>et al.</i> , 2000)                                                                                                               | (Chan <i>et al.</i> , 2000; Warrick <i>et al.</i> , 1999)<br>(Davidson <i>et al.</i> , 2000)       |
| MERRF<br>(myoclonus<br>epilepsy with<br>ragged red<br>Æbers) | Mitochondria               | Mitochondrial<br>genes                      | <a href="http://www.umdf.org/personaljourneys/olivia_steele.html">http://www.umdf.org/personaljourneys/olivia_steele.html</a><br><a href="http://www.mdausa.org/publications/Quest/q64mito.html">http://www.mdausa.org/publications/Quest/q64mito.html</a><br>OMIM: <a href="http://www.ncbi.nlm.nih.gov/entrez/dispmim.cgi?id=545000">http://www.ncbi.nlm.nih.gov/entrez/dispmim.cgi?id=545000</a> | <a href="http://www.neuro.wustl.edu/neuro/muscular/mitosyn.html">http://www.neuro.wustl.edu/neuro/muscular/mitosyn.html</a> | <a href="http://biochem.gen.ucsd.edu/mmdc/eptoc.htm">http://biochem.gen.ucsd.edu/mmdc/eptoc.htm</a><br>(Howell, 1999)<br>(Thorburn and Dahl, 2001)<br>(Orth and Schapira, 2001) | (Yasukawa <i>et al.</i> , 2001)<br>(James <i>et al.</i> , 1999)<br>(Enriquez <i>et al.</i> , 2000) |
| Tay–Sachs<br>disease                                         | Lysosomes                  | Hexos<br>aminadase,<br>HEXA                 | <a href="http://www.geocities.com/enchantedforest/pond/3061/colton.html">http://www.geocities.com/enchantedforest/pond/3061/colton.html</a><br>OMIM: <a href="http://www.ncbi.nlm.nih.gov/entrez/dispmim.cgi?id=272800">http://www.ncbi.nlm.nih.gov/entrez/dispmim.cgi?id=272800</a>                                                                                                                |                                                                                                                             | (Mahuran, 1999)<br>(Okada and O'Brien, 2001)<br>(Suzuki, 2001)                                                                                                                  | (Adamali <i>et al.</i> , 1999)<br>(Guidotti <i>et al.</i> , 1999)                                  |
| Treacher Collins<br>syndrome                                 | Nucleolus                  | Treacle,<br>TCOF1                           | <a href="http://www.treachercollins.org/main.html">http://www.treachercollins.org/main.html</a><br>OMIM: <a href="http://www.ncbi.nlm.nih.gov/entrez/dispmim.cgi?id=154500">http://www.ncbi.nlm.nih.gov/entrez/dispmim.cgi?id=154500</a>                                                                                                                                                            | (Schwarzacher and Mosgoeller, 2000)                                                                                         | (Marsh and Dixon, 2000)                                                                                                                                                         | (Splendore <i>et al.</i> , 2000)<br>(Isaac <i>et al.</i> , 2000)<br>(Dixon <i>et al.</i> , 2000)   |

<sup>a</sup>Abbreviations: ALDP = X-linked adrenoleukodystrophy protein; OMIM = Online Mendelian Inheritance in Man (web site); ANCR = Angelman Syndrome Chromosomal Region; ER = endoplasmic reticulum; NOG = noggin.

<sup>b</sup>References:

- Adamali, H.I., Somani, I.H., Huang, J.Q., Mahuran, D., Gravel, R.A., Trasler, J.M., and Hermo, L. (1999). I. Abnormalities in cells of the testis, efferent ducts, and epididymis in juvenile and adult mice with beta-hexosaminidase A and B deficiency. *J Androl.* 20, 779–802.
- Bartlett, R.J., Stockinger, S., Denis, M.M., Bartlett, W.T., Inverardi, L., Le, T.T., thi Man, N., Morris, G.E., Bogan, D.J., Metcalf-Bogan, J., and Kornegay, J.N. (2000). In vivo targeted repair of a point mutation in the canine dystrophin gene by a chimericRNA/DNA oligonucleotide. *Nat. Biotechnol.* 18, 615–622.
- Bross, P., Corydon, T.J., Andresen, B.S., Jorgensen, M.M., Bolund, L., and Gregersen, N. (1999). Protein misfolding and degradation in genetic diseases. *Hum. Mutat.* 14, 186–198.
- Burrows, J.A., Willis, L.K., and Perlmutter, D.H. (2000). Chemical chaperones mediate increased secretion of mutant alpha1-antitrypsin (alpha 1-AT) Z: a potential pharmacological strategy for prevention of liver injury and emphysema in alpha 1-AT deficiency. *Proc. Natl. Acad. Sci. USA* 97, 1796–1801.
- Cassidy, S.B., Dykens, E., and Williams, C.A. (2000). Prader–Willi and Angelman syndromes: sister imprinted disorders. *Am. J. Med.Genet.* 97, 136–146.
- Chamberlain, J.S., and Benian, G.M. (2000). Muscular dystrophy: the worm turns to genetic disease. *Curr. Biol.* 10, R795–R797.
- Chan, H.Y., Warrick, J.M., Gray-Board, G.L., Paulson, H.L., and Bonini, N.M. (2000). Mechanisms of chaperone suppression of polyglutamine disease: selectivity, synergy and modulation of protein solubility in *Drosophila*. *Hum. Mol. Genet.* 9, 2811–2820.
- Chang, C.C., Warren, D.S., Sacksteder, K.A., and Gould, S.J. (1999). PEX12 interacts with PEX5 and PEX10 and acts downstream of receptor docking in peroxisomal matrix protein import. *J. Cell. Biol.* 147, 761–774.
- Christian, J.L. (2000). BMP, Wnt and Hedgehog signals: how far can they go? *Curr. Opin. Cell. Biol.* 12, 244–249.
- Coakley, R.J., Taggart, C., O'Neill, S., and McElvaney, N.G. (2001). Alpha1-antitrypsin deficiency: biological answers to clinical questions. *Am. J. Med. Sci.* 321, 33–41.

- Davidson, J.D., Riley, B., Burright, E.N., Duvick, L.A., Zoghbi, H.Y., and Orr, H.T. (2000). Identification and characterization of an ataxin-1-interacting protein: A1Up, a ubiquitin-like nuclear protein. *Hum. Mol. Genet.* 9, 2305–2312.
- Depraetere, V. (2001). Getting activated with poly-ubiquitination. *Nat. Cell Biol.* 3, E181.
- Dixon, J., Brakebusch, C., Fassler, R., and Dixon, M.J. (2000). Increased levels of apoptosis in the pre-fusion neural folds underlie the craniofacial disorder, Treacher Collins syndrome. *Hum. Mol. Genet.* 9, 1473–1480.
- Dubowitz, V. (2000). Congenital muscular dystrophy: an expanding clinical syndrome. *Ann. Neurol.* 47, 143–144.
- Enriquez, J.A., Cabezas-Herrera, J., Bayona-Bafaluy, M.P., and Attardi, G. (2000). Very rare complementation between mitochondria carrying different mitochondrial DNA mutations points to intrinsic genetic autonomy of the organelles in cultured human cells. *J. Biol. Chem.* 275, 11207–11215.
- Eriksson, S. (1999). Alpha 1-antitrypsin deficiency. *J. Hepatol.* 30(Suppl 1), 34–39.
- Evidente, V.G., Gwinn-Hardy, K.A., Caviness, J.N., and Gilman, S. (2000). Hereditary ataxias. *Mayo. Clin. Proc.* 75, 475–490.
- Fuchs, E. (1998). Beauty is skin deep: the fascinating biology of the epidermis and its appendages. *Harvey Lect.* 94, 47–77.
- Fuchs, E., and Cleveland, D.W. (1998). A structural scaffolding of intermediate filaments in health and disease. *Science.* 279, 514–519.
- Gottesman, M.M., and Ambudkar, S.V. (2001). Overview: ABC transporters and human disease. *J. Bioenerg. Biomembr.* 33, 453–458.
- Gould, S.J., and Valle, D. (2000). Peroxisome biogenesis disorders: genetics and cell biology. *Trends Genet.* 16, 340–345.
- Gruenbaum, Y., Wilson, K.L., Harel, A., Goldberg, M., and Cohen, M. (2000). Review: nuclear lamins—structural proteins with fundamental functions. *J. Struct. Biol.* 129, 313–323.
- Guidotti, J.E., Mignon, A., Haase, G., Caillaud, C., McDonnell, N., Kahn, A., and Poenaru, L. (1999). Adenoviral gene therapy of the Tay–Sachs disease in hexosaminidase A-deficient knock-out mice. *Hum. Mol. Genet.* 8, 831–838.
- Harter, C., and Reinhard, C. (2000). The secretory pathway from history to the state of the art. *Subcell. Biochem.* 34, 1–38.
- Harvey, S.J., Mount, R., Sado, Y., Naito, I., Ninomiya, Y., Harrison, R., Jefferson, B., Jacobs, R., and Thorner, P.S. (2001). The inner ear of dogs with X-linked nephritis provides clues to the pathogenesis of hearing loss in X-linked Alport syndrome. *Am. J. Pathol.* 159, 1097–1104.
- Heidet, L., Cai, Y., Guicharnaud, L., Antignac, C., and Gubler, M.C. (2000). Glomerular expression of type IV collagen chains in normal and X-linked Alport syndrome kidneys. *Am. J. Pathol.* 156, 1901–1910.
- Heikkila, P., Tibell, A., Morita, T., Chen, Y., Wu, G., Sado, Y., Ninomiya, Y., Pettersson, E., and Tryggvason, K. (2001). Adenovirus-mediated transfer of type IV collagen alpha5 chain cDNA into swine kidney in vivo: deposition of the protein into the glomerular basement membrane. *Gene Ther.* 8, 882–890.
- Helvering, L.M., Sharp, R.L., Ou, X., and Geiser, A.G. (2000). Regulation of the promoters for the human bone morphogenetic protein 2 and 4 genes. *Gene* 256, 123–138.
- Herrmann, H., and Aebi, U. (2000). Intermediate filaments and their associates: multi-talented structural elements specifying cytoarchitecture and cytodynamics. *Curr. Opin. Cell Biol.* 12, 79–90.
- Howell, N. (1999). Human mitochondrial diseases: answering questions and questioning answers. *Int. Rev. Cytol.* 186, 49–116.
- Hutchison, C.J., Alvarez-Reyes, M., and Vaughan, O.A. (2001). Lamins in disease: why do ubiquitously expressed nuclear envelope proteins give rise to tissue-specific disease phenotypes? *J. Cell Sci.* 114, 9–19.
- Isaac, C., Marsh, K.L., Paznekas, W.A., Dixon, J., Dixon, M.J., Jabs, E.W., and Meier, U.T. (2000). Characterization of the nucleolar gene product, treacle, in Treacher Collins syndrome. *Mol. Biol. Cell.* 11, 3061–3071.
- James, A.M., Sheard, P.W., Wei, Y.H., and Murphy, M.P. (1999). Decreased ATP synthesis is phenotypically expressed during increased energy demand in fibroblasts containing mitochondrial tRNA mutations. *Eur. J. Biochem.* 259, 462–469.
- Janciauskiene, S. (2001). Conformational properties of serine proteinase inhibitors (serpins) confer multiple pathophysiological roles. *Biochim. Biophys. Acta* 1535, 221–235.
- Johnson, W.G. (2000). Late-onset neurodegenerative diseases—the role of protein insolubility. *J. Anat.* 196(Pt. 4), 609–616.
- Jones, J.C., Dehart, G.W., Gonzales, M., and Goldfinger, L.E. (2000). Laminins: an overview. *Microsc. Res. Tech.* 51, 211–213.
- Liu, L.X., Janvier, K., Berteaux-Lecellier, V., Cartier, N., Benarous, R., and Aubourg, P. (1999). Homo- and heterodimerization of peroxisomal ATP-binding cassette half-transporters. *J. Biol. Chem.* 274, 32738–32743.
- Mahuran, D.J. (1999). Biochemical consequences of mutations causing the GM2 gangliosidosis. *Biochim. Biophys. Acta* 1455, 105–138.
- Marsh, K.L., and Dixon, M.J. (2000). Treacher Collins syndrome. *Adv. Otorhinolaryngol.* 56, 53–59.
- Mayer, R.J. (2000). The meteoric rise of regulated intracellular proteolysis. *Nat. Rev. Mol. Cell Biol.* 1, 145–148.
- McCarthy, P.A., and Maino, D.M. (2000). Alport syndrome: a review. *Clin. Eye Vis. Care* 12, 139–150.
- McGowan, K.A., and Marinkovich, M.P. (2000). Laminins and human disease. *Microsc. Res. Tech.* 51, 262–279.
- Miyazono, K., Kusanagi, K., and Inoue, H. (2001). Divergence and convergence of TGF-beta/BMP signaling. *J. Cell. Physiol.* 187, 265–276.
- Morris, G.E. (2000). Nuclear proteins and cell death in inherited neuromuscular disease. *Neuromuscul. Disord.* 10, 217–227.
- Moser, H.W. (2000). Molecular genetics of peroxisomal disorders. *Front. Biosci.* 5, D298–D306.
- Myllyharju, J., and Kivirikko, K.I. (2001). Collagens and collagen-related diseases. *Ann. Med.* 33, 7–21.
- Nagano, A., and Arahata, K. (2000). Nuclear envelope proteins and associated diseases. *Curr. Opin. Neurol.* 13, 533–539.
- Nakayama, T., Cui, Y., and Christian, J.L. (2000). Regulation of BMP/Dpp signaling during embryonic development. *Cell. Mol. Life. Sci.* 57, 943–956.
- Nawaz, Z., Lonard, D.M., Smith, C.L., Lev-Lehman, E., Tsai, S.Y., Tsai, M.J., and O'Malley, B.W. (1999). The Angelman syndrome-associated protein, E6-AP, is a coactivator for the nuclear hormone receptor superfamily. *Mol. Cell. Biol.* 19, 1182–1189.
- Okada, S., and O'Brien, J.S. (2001). Discovery of beta-hexosaminidase A deficiency in Tay–Sachs disease. *Adv. Genet.* 44, 61–66.
- Orth, M., and Schapira, A.H. (2001). Mitochondria and degenerative disorders. *Am. J. Med. Genet.* 106, 27–36.
- Parry, D.A., and Steinert, P.M. (1999). Intermediate filaments: molecular architecture, assembly, dynamics and polymorphism. *Q. Rev. Biophys.* 32, 99–187.
- Patton, B.L. (2000). Laminins of the neuromuscular system. *Microsc. Res. Tech.* 51, 247–261.
- Peters, B., Kirfel, J., Bussow, H., Vidal, M., and Magin, T.M. (2001). Complete cytolysis and neonatal lethality in keratin 5 knockout mice reveal its fundamental role in skin integrity and in epidermolysis bullosa simplex. *Mol. Biol. Cell.* 12, 1775–1789.
- Purdue, P.E., and Lazarow, P.B. (2001). Peroxisome biogenesis. *Annu. Rev. Cell Dev. Biol.* 17, 701–752.
- Reddi, A.H. (1997). BMPs: actions in flesh and bone. *Nat. Med.* 3, 837–839.
- Schwarzacher, H. G., and Mosgoeller, W. (2000). Ribosome biogenesis in man: current views on nucleolar structures and function. *Cytogenet. Cell Genet.* 91, 243–252.

- Splendore, A., Silva, E.O., Alonso, L.G., Richieri-Costa, A., Alonso, N., Rosa, A., Carakushanky, G., Cavalcanti, D.P., Brunoni, D., and Passos-Bueno, M.R. (2000). High mutation detection rate in TCOF1 among Treacher Collins syndrome patients reveals clustering of mutations and 16 novel pathogenic changes. *Hum. Mutat.* 16, 315–322.
- Stockley, R.A. (2001). Proteases and antiproteases. *Novartis Found. Symp.* 234, 189–199; discussion 199–204.
- Suzuki, K. (2001). Recognition and delineation of beta-hexosaminidase alpha-chain variants: a historical and personal perspective. *Adv. Genet.* 44, 173–184.
- Thorburn, D.R., and Dahl, H.H. (2001). Mitochondrial disorders: genetics, counseling, prenatal diagnosis and reproductive options. *Am. J. Med. Genet.* 106, 102–114.
- Warrick, J.M., Chan, H.Y., Gray-Board, G.L., Chai, Y., Paulson, H.L., and Bonini, N.M. (1999). Suppression of polyglutamine-mediated neurodegeneration in *Drosophila* by the molecular chaperone HSP70. *Nat. Genet.* 23, 425–428.
- Weissman, A.M. (2001). Themes and variations on ubiquitylation. *Nat. Rev. Mol. Cell. Biol.* 2, 169–178.
- Wilkinson, K.D. (2000). Ubiquitination and deubiquitination: targeting of proteins for degradation by the proteasome. *Semin. Cell Dev. Biol.* 11, 141–148.
- Williams, C.A., Lossie, A., and Driscoll, D. (2001). Angelman syndrome: mimicking conditions and phenotypes. *Am. J. Med. Genet.* 101, 59–64.
- Wilson, K.L. (2000). The nuclear envelope, muscular dystrophy and gene expression. *Trends Cell Biol.* 10, 125–129.
- Winder, S.J. (2001). The complexities of dystroglycan. *Trends Biochem. Sci.* 26, 118–124.
- Yamada, M., Tsuji, S., and Takahashi, H. (2000). Pathology of CAG repeat diseases. *Neuropathology* 20, 319–325.
- Yasukawa, T., Suzuki, T., Ishii, N., Ohta, S., and Watanabe, K. (2001). Wobble modification defect in tRNA disturbs codon–anticodon interaction in a mitochondrial disease. *EMBO J.* 20, 4794–4802.
- Zolman, B.K., Silva, I.D., and Bartel, B. (2001). The Arabidopsis pxa1 mutant is defective in an ATP-binding cassette transporter-like protein required for peroxisomal fatty acid beta-oxidation. *Plant. Physiol.* 127, 1266–1278.
-
