# Supplementary material for: Learning Cell Biology as a Team: A Project-Based Approach to Upper-Division Cell Biology
Source: Atypon-hosted journal article supplement (doi:10.1187/cbe.02-03-0006), 2002-12-01
Supplement: cellbioed_1_4_145_appendix_f.pdf [file cellbioed_1_4_145_appendix_f.pdf]

## Appendix F

### Example of Guided Activity to Help Teams Plan and Organize Their Efforts

1. Imagine that you are sent into a room to give the news to a patient (or the patient's parents) that he or she (or their child) has the disease you are studying. What questions would this person (or people) ask you about the disease?
2. Imagine that you are presenting the cell and molecular biology of your disease to other UW [University of Washington] biology students. What questions would they ask you about this disease?
3. Imagine that you are talking to the most famous and important researchers in the world working on your disease. What would you ask them about this disease?
4. Arrange the three types of questions into a logical outline. Use the project checklist to help you organize this information. If you feel that the project checklist should be changed to reflect your particular ideas, discuss it with Robin. **THIS IS ONE OF THE MOST IMPORTANT STEPS.** Be sure you have a clear idea of **WHAT** you want your paper and presentation to answer about your disease.
5. What key events must occur for you to prepare your paper and presentation? What are the steps in order? When should each be completed? Who is responsible and what are those responsibilities?

| What needs to be done? | Order in which the item needs to be completed. | When is the deadline for completion? | Who is responsible? Explain. |
|------------------------|------------------------------------------------|--------------------------------------|------------------------------|
|                        |                                                |                                      |                              |
|                        |                                                |                                      |                              |
|                        |                                                |                                      |                              |
|                        |                                                |                                      |                              |
|                        |                                                |                                      |                              |
|                        |                                                |                                      |                              |
