# Supplementary material for: Learning Cell Biology as a Team: A Project-Based Approach to Upper-Division Cell Biology
Source: Atypon-hosted journal article supplement (doi:10.1187/cbe.02-03-0006), 2002-12-01
Supplement: cellbioed_1_4_145_appendix_g.pdf [file cellbioed_1_4_145_appendix_g.pdf]

## Appendix G

### Comparison Chart of Features of Human Diseases

| <i>Genetics</i>                                                                                                                                                  | 1: EDMD | 2: MJD | 3: TCS | 4: ALD |
|------------------------------------------------------------------------------------------------------------------------------------------------------------------|---------|--------|--------|--------|
| Gene(s) name                                                                                                                                                     |         |        |        |        |
| Chromosomal location                                                                                                                                             |         |        |        |        |
| Inheritance (autosomal? X-linked? dominant or recessive?)                                                                                                        |         |        |        |        |
| In what types of cells and when is gene expressed?                                                                                                               |         |        |        |        |
| Number & types of mutations                                                                                                                                      |         |        |        |        |
| Evolutionarily conserved? To what degree?                                                                                                                        |         |        |        |        |
| <i>Protein</i>                                                                                                                                                   | 1: EDMD | 2: MJD | 3: TCS | 4: ALD |
| Size, number of amino acids?                                                                                                                                     |         |        |        |        |
| Location of protein in the cell                                                                                                                                  |         |        |        |        |
| Protein binds to or interacts with ...                                                                                                                           |         |        |        |        |
| Structural features of protein                                                                                                                                   |         |        |        |        |
| Protein function                                                                                                                                                 |         |        |        |        |
| In what classes of organisms is this protein found? Explain.                                                                                                     |         |        |        |        |
| <i>Organismal features of disease</i>                                                                                                                            | 1: EDMD | 2: MJD | 3: TCS | 4: ALD |
| What are the major symptoms of disease in LAY TERMS?                                                                                                             |         |        |        |        |
| Related genetic diseases?                                                                                                                                        |         |        |        |        |
| What types of cells are affected? Why?                                                                                                                           |         |        |        |        |
| Unusual features of disease                                                                                                                                      |         |        |        |        |
| Animal models for disease                                                                                                                                        |         |        |        |        |
| <i>Cellular &amp; molecular biology of disease</i>                                                                                                               | 1: EDMD | 2: MJD | 3: TCS | 4: ALD |
| What organelle or process is affected in this disease? What is the normal function of this organelle or process?                                                 |         |        |        |        |
| In what types of cells, organisms, kingdoms, etc., is this organelle (process) found? What evolutionary variations exist?                                        |         |        |        |        |
| How do the mutations alter function of the organelle or process, resulting in disease symptoms? What is the connection between the mutation and the symptoms?    |         |        |        |        |
| <i>Relationships to your disease</i>                                                                                                                             | 1: EDMD | 2: MJD | 3: TCS | 4: ALD |
| Compare and contrast features of this disease to the one you are researching.                                                                                    |         |        |        |        |
| <sup>a</sup> Abbreviations: EDMD = Emery–Dreifuss muscular dystrophy; MJD = Machado–Joseph disease; TCS = Treacher Collins Syndrome; ALD = adrenoleukodystrophy. |         |        |        |        |
